# Supplementary material for: Observations of tracer ventilation in the Cape Basin, Agulhas Current Retroflection
Source: Copernicus journal article supplement (doi:10.5194/os-22-209-2026), 2026-01-20
Supplement: Supplementary file 1 [file os-22-209-2026-supplement.pdf]

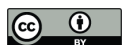

*Supplement of*

## **Observations of tracer ventilation in the Cape Basin, Agulhas Current Retroflexion**

**Renske Koets et al.**

*Correspondence to:* Renske Koets ([renske.koets@gmail.com](mailto:renske.koets@gmail.com))

The copyright of individual parts of the supplement might differ from the article licence.

### Rossby number calculation

The Rossby number (Ro) was calculated as the ratio between the relative vorticity ( $\zeta$ ) and the Coriolis parameter ( $f$ ):

$$Ro = \frac{\zeta}{f}, \quad (S1)$$

where the relative vorticity was estimated along the glider track as the horizontal gradient of the geostrophic velocity:

$$5 \quad \zeta = \frac{\partial u_g}{\partial x}, \quad (S2)$$

with  $u_g$  the geostrophic velocity component perpendicular to the track.

### Vertical velocity calculation

Vertical velocities were estimated using the Q-vector version of the Omega equation:

$$N^2 w_{xx} + f^2 w_{zz} = -2(u_x b_x)_x, \quad (S3)$$

- 10 where the subscripts indicate the derivatives,  $N^2$  is the Brunt–Väisälä frequency,  $w$  is the vertical velocity,  $f$  is the Coriolis parameter,  $u_x$  is the gradient of geostrophic velocity along the glider track, and  $b_x$  is the horizontal buoyancy gradient. The equation was solved using a differential equation solver with boundary conditions  $w = 0$  at the surface and bottom, and  $\partial w / \partial x = 0$  at the minimum and maximum distances along the glider's track.

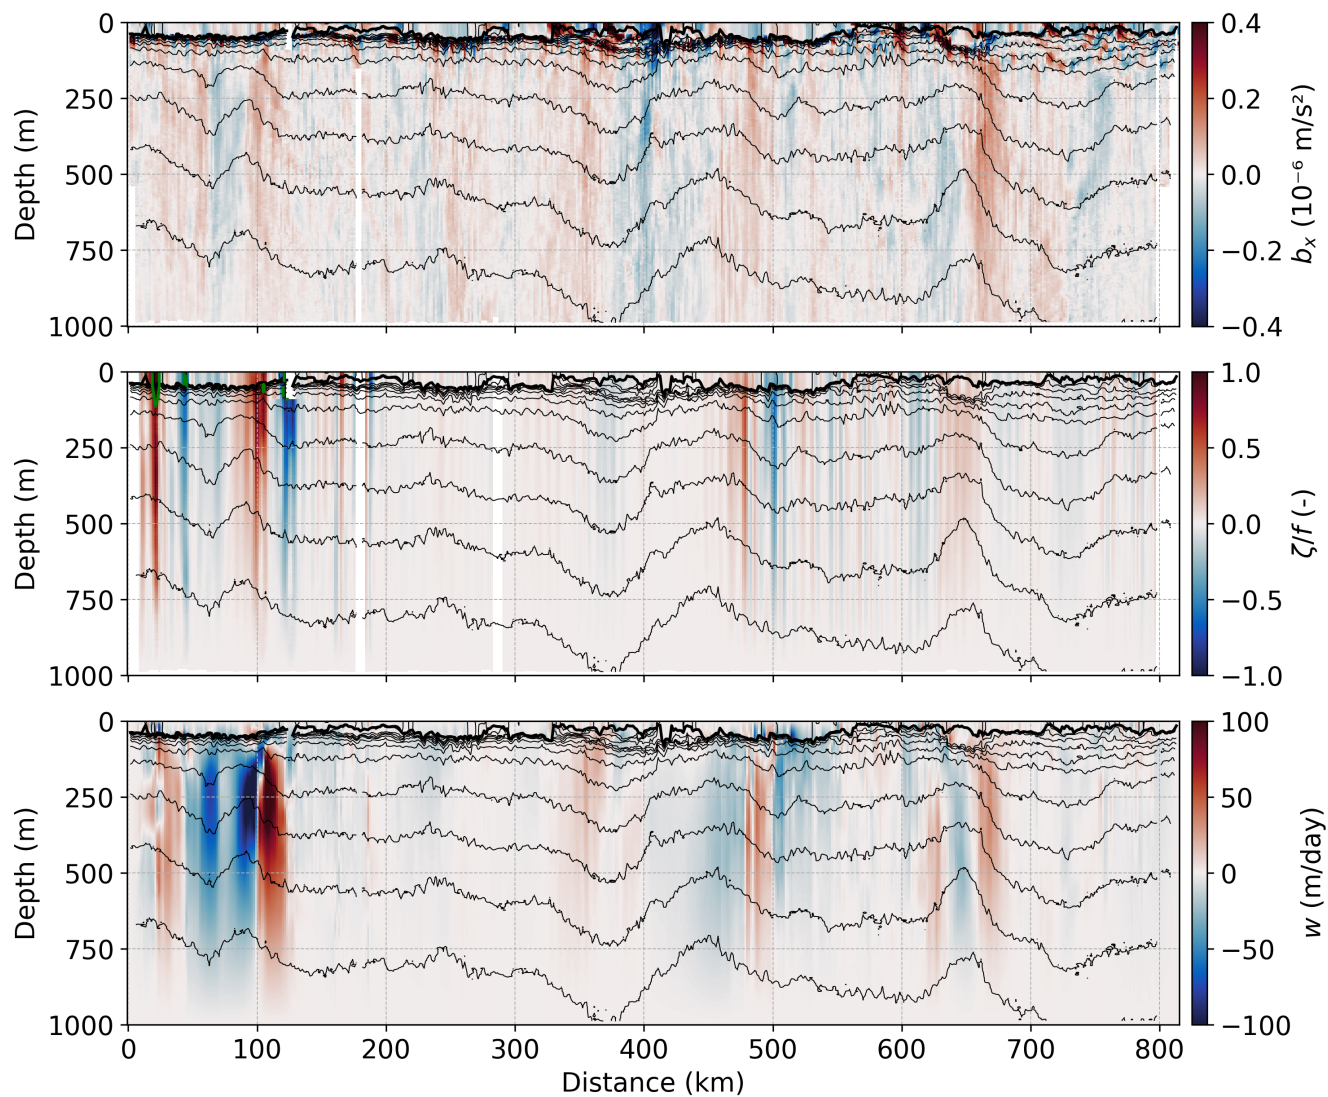

**Figure S1.** Glider sections showing (a) horizontal buoyancy gradient, (b) normalized relative vorticity, with green contours showing  $Ro \sim 1$ , and (c) vertical velocity. Isopycnals are overlaid using thin black contours and the MLD is depicted with the thick black line.

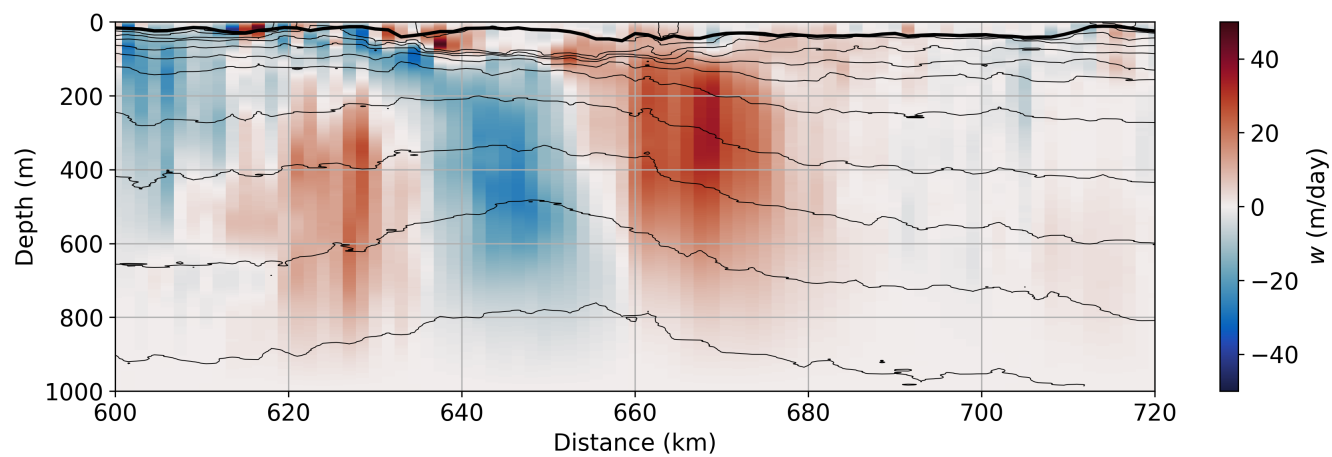

**Figure S2.** Glider section showing the vertical velocity. Isopycnals are overlaid using thin black contours and the MLD is depicted with the thick black line.
